# Supplementary material for: Prognostic Implication of a Cuproptosis-Related miRNA Signature in Hepatocellular Carcinoma
Source: J Healthc Eng. 2022 Sep 13;2022:4694323. doi: 10.1155/2022/4694323 (PMC9489400; doi:10.1155/2022/4694323)
Supplement: Supplementary Materials — Supplement Table 1: Cuproptosis-related genes. Supplement Table 2: Immune checkpoint-related genes. [file 4694323.f1.zip]

Archive with 2 entries (2 files):
- 4694323.f1/Supplement table 1.txt
- 4694323.f1/Supplement table 2.txt
