# Supplementary material for: Prognostic Implication of a Cuproptosis-Related miRNA Signature in Hepatocellular Carcinoma
Source: J Healthc Eng. 2022 Sep 13;2022:4694323. doi: 10.1155/2022/4694323 (PMC9489400; doi:10.1155/2022/4694323)
Supplement: Supplementary Materials — Supplement Table 1: Cuproptosis-related genes. Supplement Table 2: Immune checkpoint-related genes. [file 4694323.f1.zip › 4694323.f1/Supplement table 1.txt]

Cuproptosis related genes
FDX1
LIPT1
LIAS
DLD
DBT
GCSH
DLST
DLAT
PDHA1
PDHB
SLC31A1
ATP7A
ATP7B
  
